# Supplementary material for: Preparation and Properties of Corn Starch/Chitin Composite Films Cross-Linked by Maleic Anhydride
Source: MDPI journal article supplement (doi:10.3390/polym12071606), 2020-07-19
Supplement: s1 [file s1]

## Supplmentary Materials

### Preparation and properties of corn starch/chitin composite films cross-linked by maleic anhydride

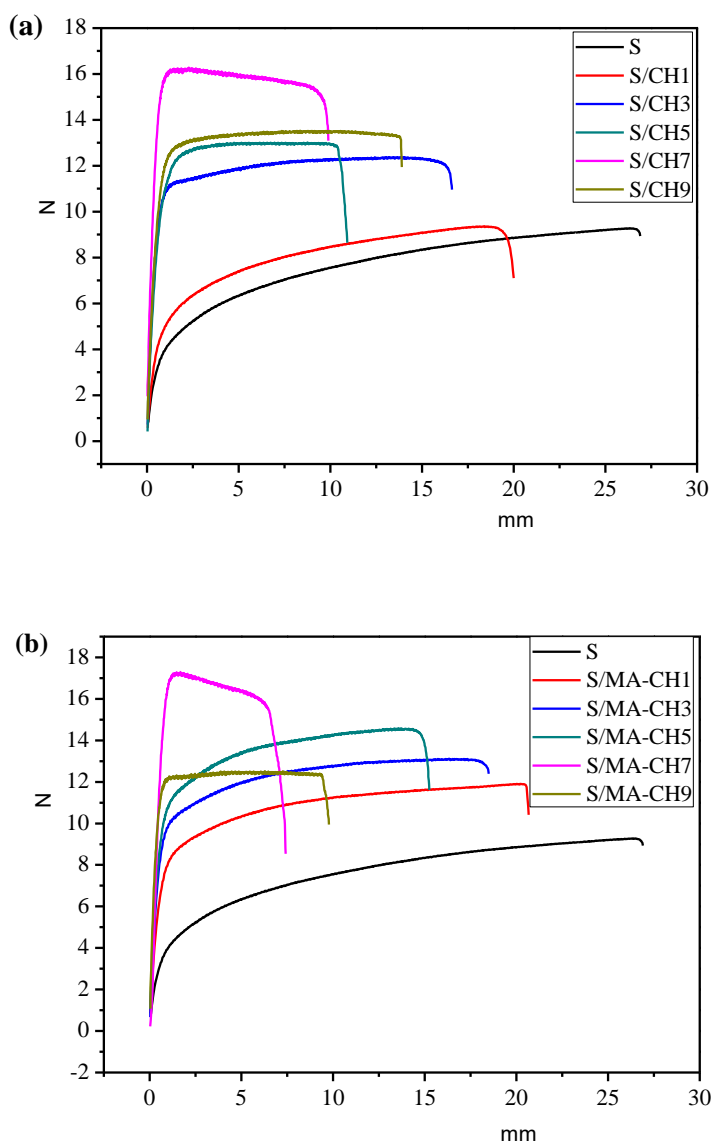

**Figure S1.** Tensile test curve of (a) S films, S/CH 1% films, S/CH 3% films, S/CH 5% films, S/CH 7% films, S/CH 9% and (b) S films, S/MA-CH 1% films, S/MA-CH 3% films, S/MA-CH 5% films, S/MA-CH 7% films and S/MA-CH 9% films.
